# Supplementary material
Source: publisher site journal article supplement (https://edge.sagepub.com/sites/default/files/Appendix_10.pdf)
Supplement: Supplementary file 1 [file Appendix_10.pdf]

# Appendix 10

## More Ways to Use the Lessons in an English Language Arts Classroom

### Starting With a Plan Sheet

#### Change the Structure

1. Revise the structure. Rewrite one (or more) of the boxes to create an adapted text structure. Write a kernel essay afterward to see how it works. If you like it, add the structure to your collection.
2. Rearrange the structure. Rearrange the boxes, and read the resulting structure. If you like it, write a kernel essay.
3. Play with opposites. Add the word *not* to one or more of the boxes or to the structure title and see what happens.

#### Change the Speaker or Point of View

4. Write as someone else. Start with a structure and ask yourself, “Who might ever need to deliver this message?” Pick a character from fiction (a book or movie) or from the world (history, sports, popular culture, world politics, or business). Write in first person as that person.
5. Write about someone else. Do the same as above, but write in third person about that person.
6. Write in third person about yourself. Imagine how someone else would phrase the sentences.

#### Mix and Match Kernel Essays

7. Luck of the draw. Using a single kernel essay structure, write the kernel sentences on separate small cards. Put everyone’s first sentence in a bag, everyone’s second sentence in a bag, and so forth. Have students draw one card from each bag, and see what new crazy kernel they create.
8. Story starter essay. Ask for three volunteers to share their first sentence from a single kernel essay structure, and put these on the board. Let everyone choose one and write their own kernel essay using that beginning sentence.
9. Have students write a kernel essay from a single kernel essay structure. Next, do a read-around, with each student only reading one sentence from his or her kernel. These can be the same sentence to hear the variety in sentence constructions and content or sequential sentences to listen for random connection.

### Starting With a Collection of Text Structures

#### Write a Response to a Book

1. Write a pressing message from a character. Look over the structures, and find one that works for your character. Write a kernel essay first, and then flesh it out with details from the story.

2. Choose one character, use three different structures, and write three different kernel essays. Flesh one out.
3. Choose three different characters, three different structures, and write three different kernel essays.
4. Play “Name That Structure.” Students read their kernel essays aloud, and the class figures out which structure it is.
5. Study one character from fiction, and do one of the following projects:
  - Make a timeline of the character’s life.
  - Choose five different important moments from the character’s life.
  - Use five different text structures, and write five different pieces, one about each of those moments.

(Assignment sheet and tracking sheet follow.)

### **Write Autobiographically**

6. Think of five important moments in your life. Browse the structures, and choose five. Write a kernel essay for each of those specific moments in your life. Flesh out several.
7. Make a list of dramatic memories in your life. Think about other people in your close circle, and choose a structure about a message that you witnessed them delivering to someone.

### **Write Fiction**

8. Start a short story. Browse the structures, and choose one. Write a kernel essay from the point of view of a made-up person who is younger or older than you. Continue their story from there.
9. Write fan fiction. Imagine a character you already know from a book, movie, or television show in a new situation. Use one of the essay structures to write a kernel essay about this character.

## **Starting With the Source Document**

### **Starting With the Document**

1. Look at the opening and closing. Rewrite either.
2. Hunt for the rhetorical devices, especially in speeches before large crowds.
3. Do a figurative language hunt (for metaphors, alliteration, etc.).
4. Examine the transitions. Highlight them, and then use them in your own essay.
5. Check the punctuation in the original document.
6. Rewrite part of the source document, deleting all the punctuation. Read it aloud.
7. Use the source document for a hunt for any grammatical constructions you’ve studied in language arts class (nouns? prepositional phrases? compound sentences? items in a series?).
8. Choose the best sentence. Copy these onto small posters for the room. Use those sentences as patterns to emulate.
